# Supplementary material for: Chemical Investigation and Screening of Anti-Proliferative Activity on Human Cell Lines of Pure and Nano-Formulated Lavandin Essential Oil
Source: PubMed Central journal article supplement (PMC7692866; doi:10.3390/ph13110352), 2020-10-29
Supplement: pharmaceuticals-13-00352-s001.pdf [file pharmaceuticals-13-00352-s001.pdf]

## Chemical investigation and screening of anti-proliferative activity on human cell lines of pure and nano-formulated lavandin essential oil

Elisa Ovidi<sup>1</sup>, Valentina Laghezza Masci<sup>1</sup>, Anna Rita Taddei<sup>2</sup>, Patrizia Paolicelli<sup>3</sup>, Stefania Petralito<sup>3</sup>, Jordan Trilli<sup>3</sup>, Fabio Mastrogiovanni<sup>1</sup>, Antonio Tiezzi<sup>1</sup>, Maria Antonietta Casadei<sup>3</sup>, Pierluigi Giacomello<sup>3</sup>, Stefania Garzoli<sup>3\*</sup>

<sup>1</sup> Department for the Innovation in Biological, Agrofood and Forestal Systems, Tuscia University, Viterbo, Italy; laghezzamasci@unitus.it (V.L.M.); fabiomastro85@gmail.com (F.M.); antoniot@unitus.it (A.T.); eovidi@unitus.it (E.O.)

<sup>2</sup> High Equipment Centre, Tuscia University, 01100 Viterbo, Italy; artaddei@unitus.it (A.R.T.)

<sup>3</sup> Department of Drug Chemistry and Technology, Sapienza University, Rome, Italy; stefania.garzoli@uniroma1.it (S.G.); pierluigi.giacomello@uniroma1.it (P.G.); patrizia.paolicelli@uniroma1.it (P.P.); stefania.petralito@uniroma1.it (S.P.); mariaantionietta.casadei@uniroma1.it (M.A.C.)

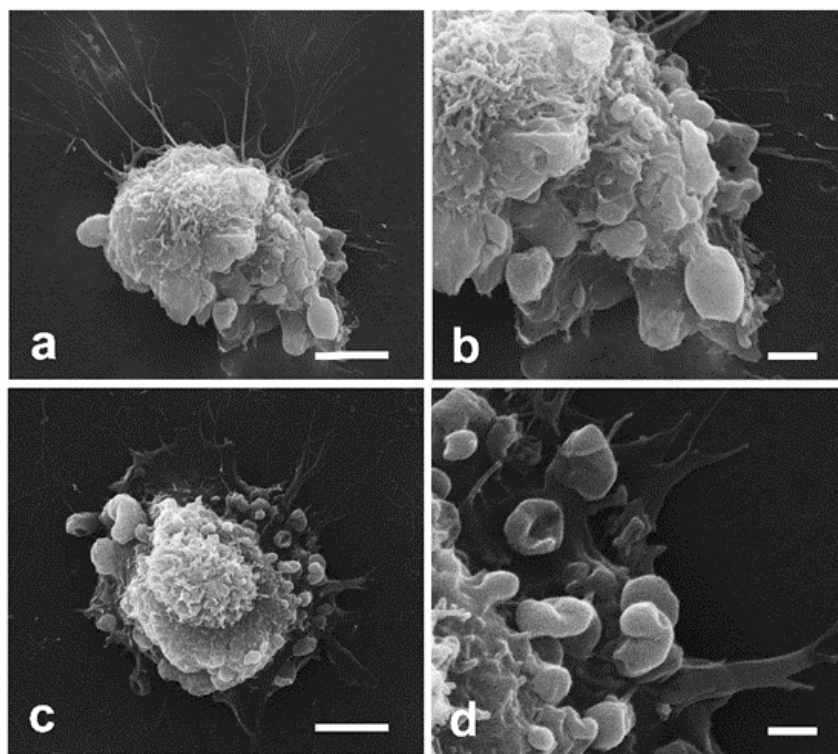

**Figure S1.** Scanning electron microscopy of apoptotic Caco-2 cells. The apoptotic features as reduction of the cell volume, a roundish shape, detachment from the surface and apoptotic membrane blebbing are clearly evident after treatment with LEO and NanoLEO. (a) LEO treated cell; (b) Particular of apoptotic membrane blebbing of LEO treated cell; (c) NanoLEO treated cell; (d) Particular of apoptotic membrane blebbing of NanoLEO treated cell. Bars: = (a), (c) 5  $\mu\text{m}$ ; (b), (d) 1  $\mu\text{m}$ .
